# Supplementary material
Source: PubMed Central journal article supplement (PMC2846046)
Supplement: JCI40120sd.pdf [file JCI40120sd.pdf]

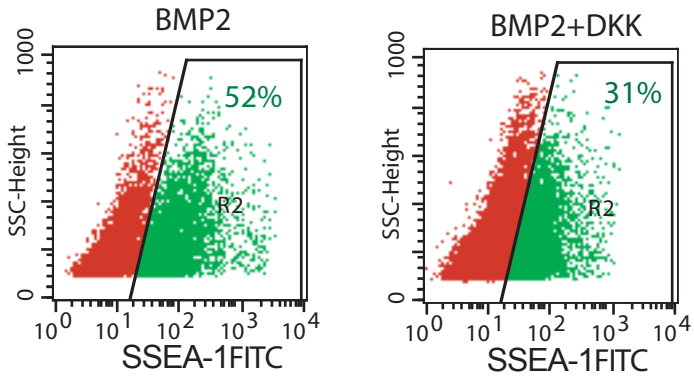

supl Fig1

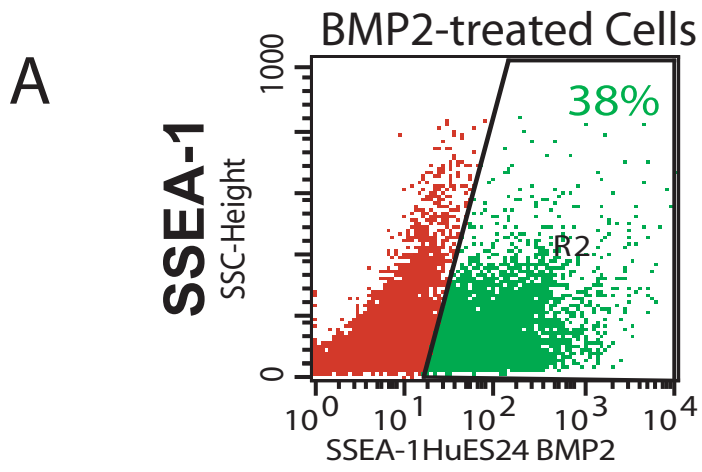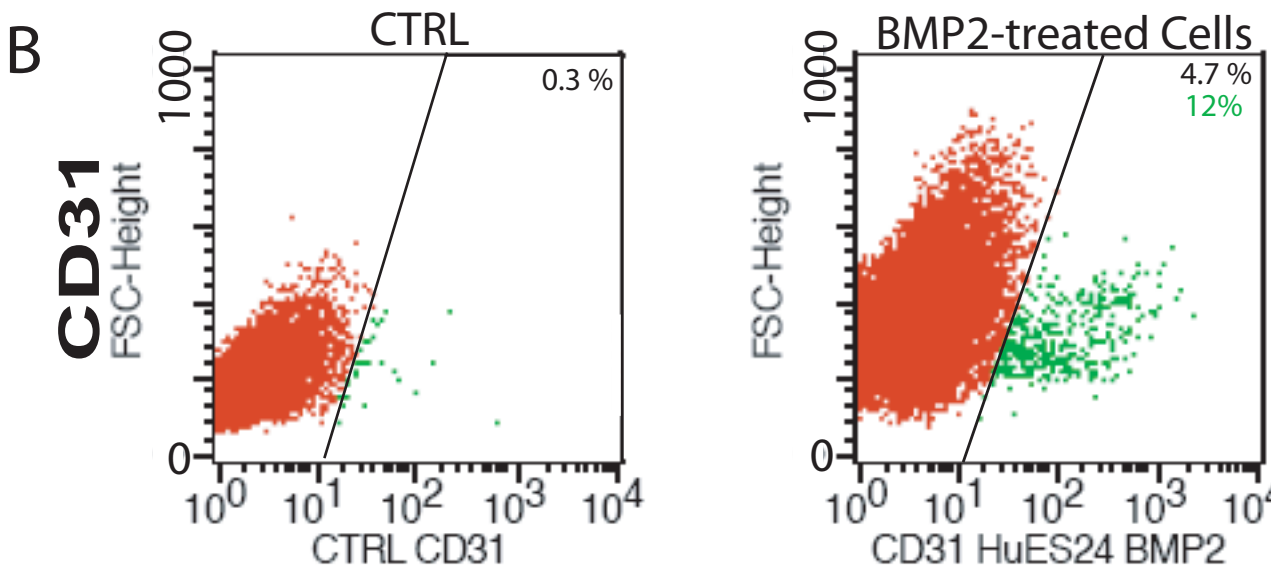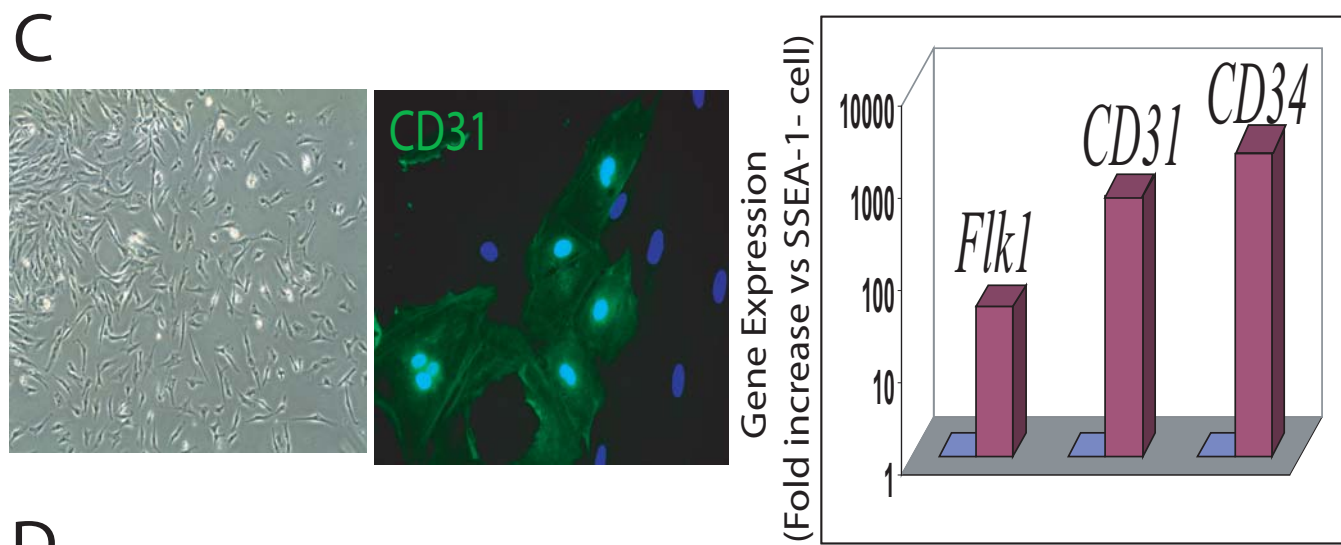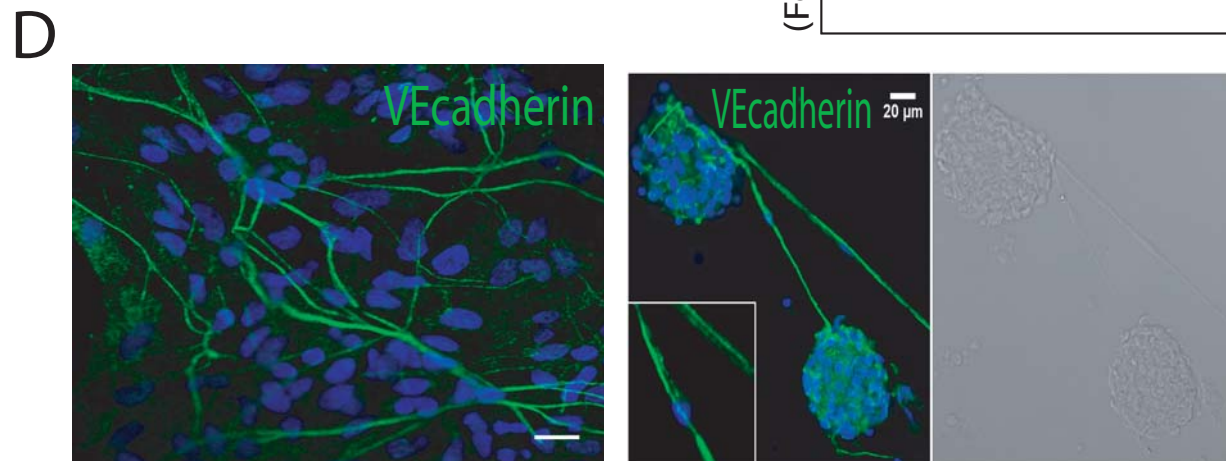

A

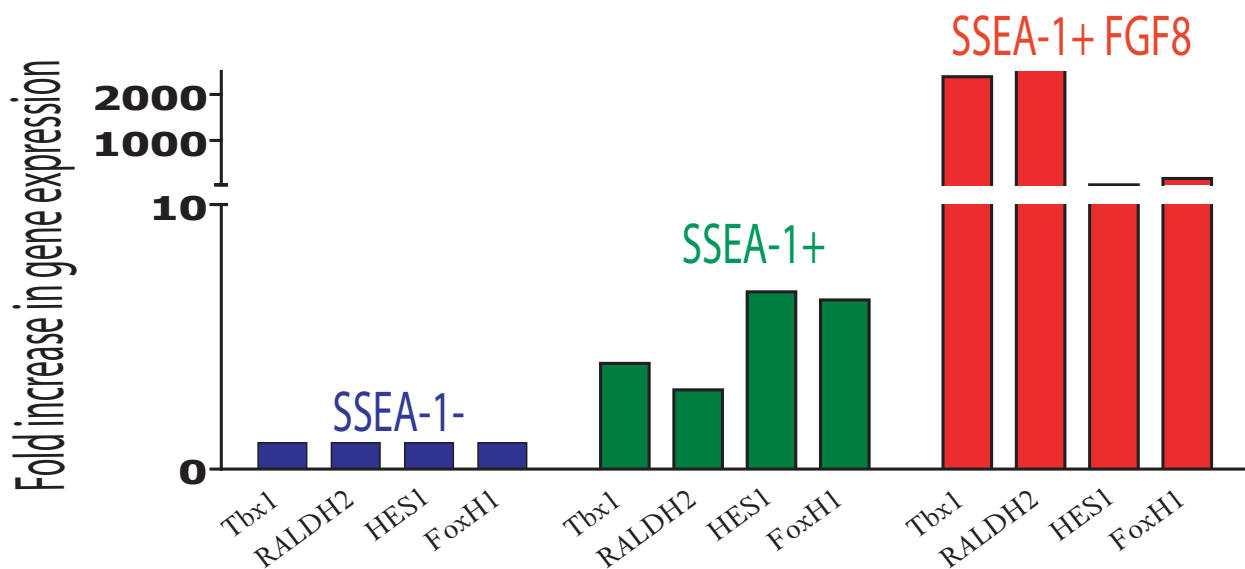

B

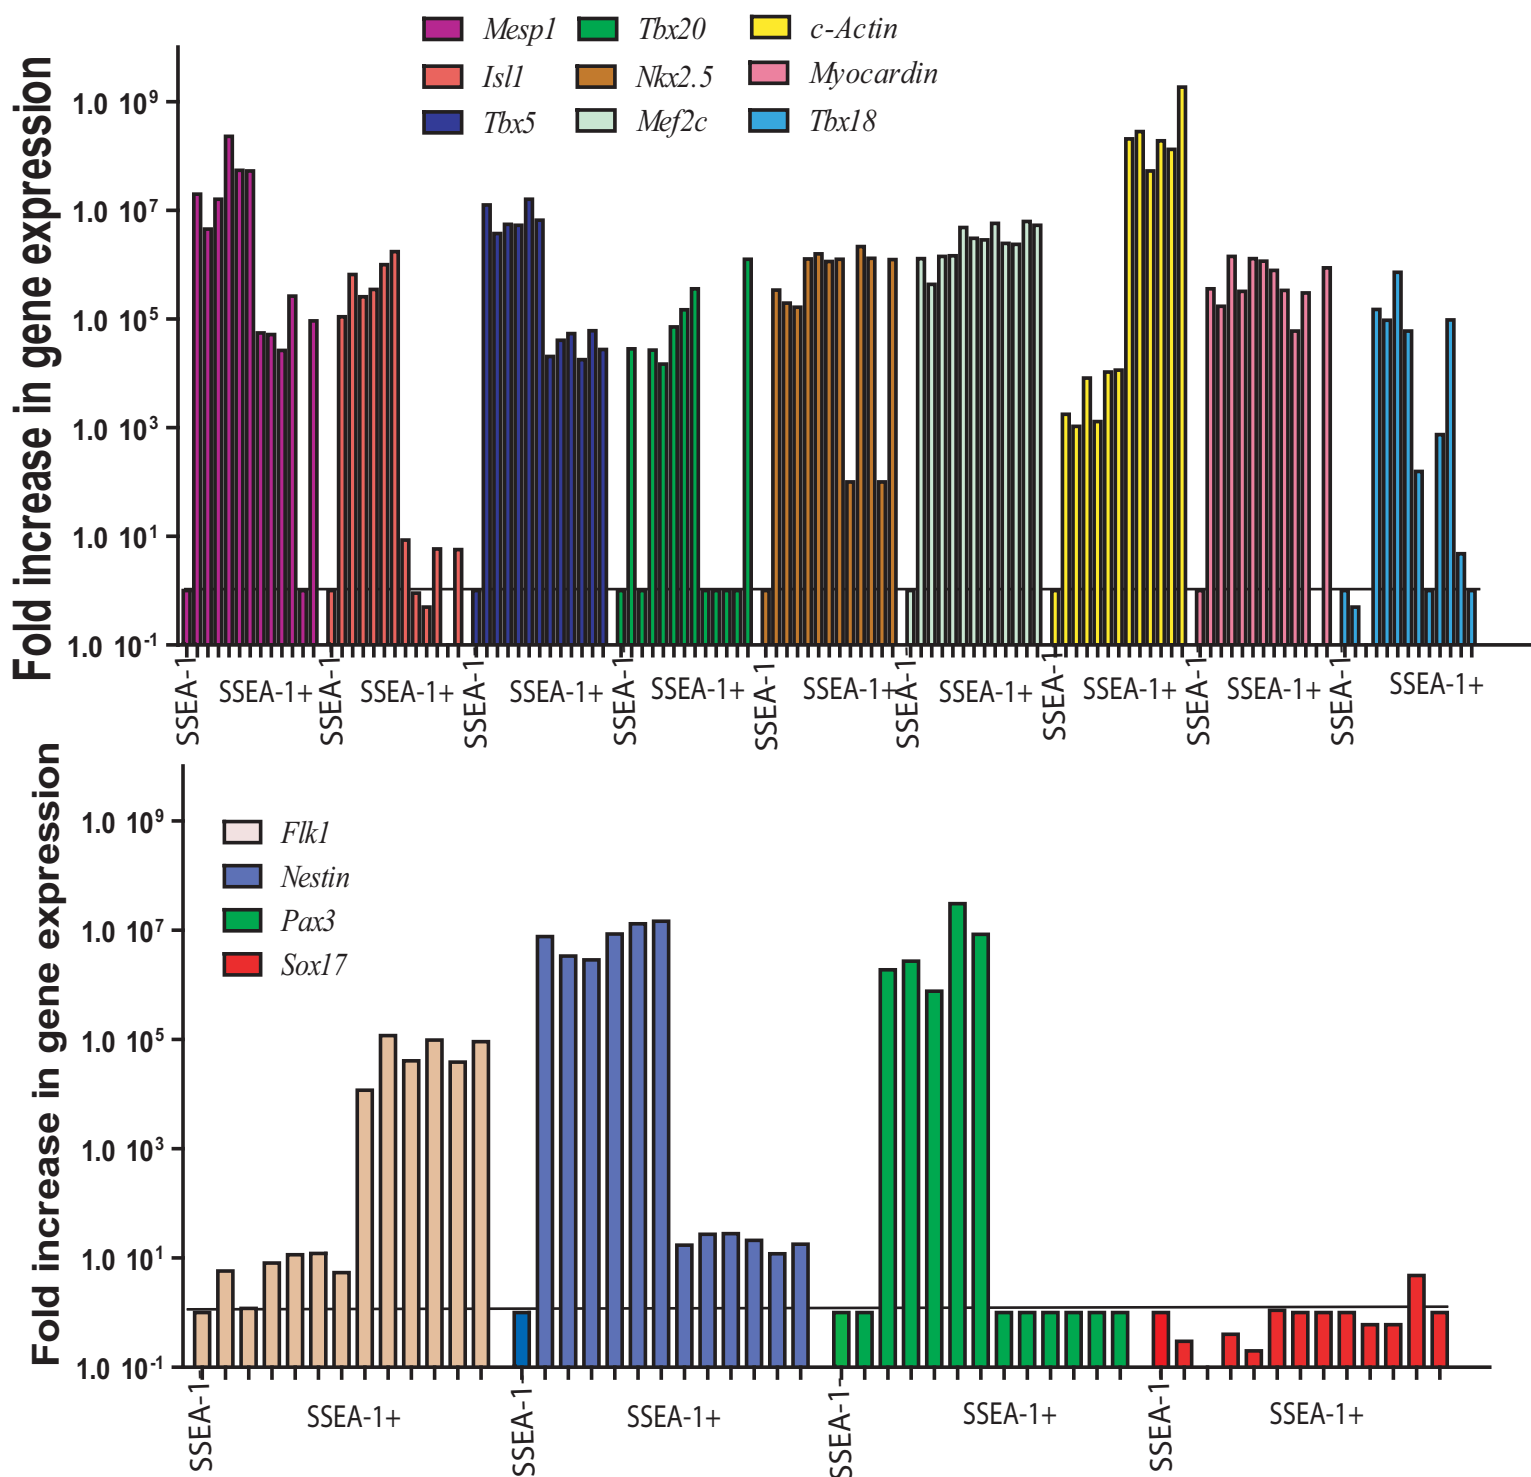

A

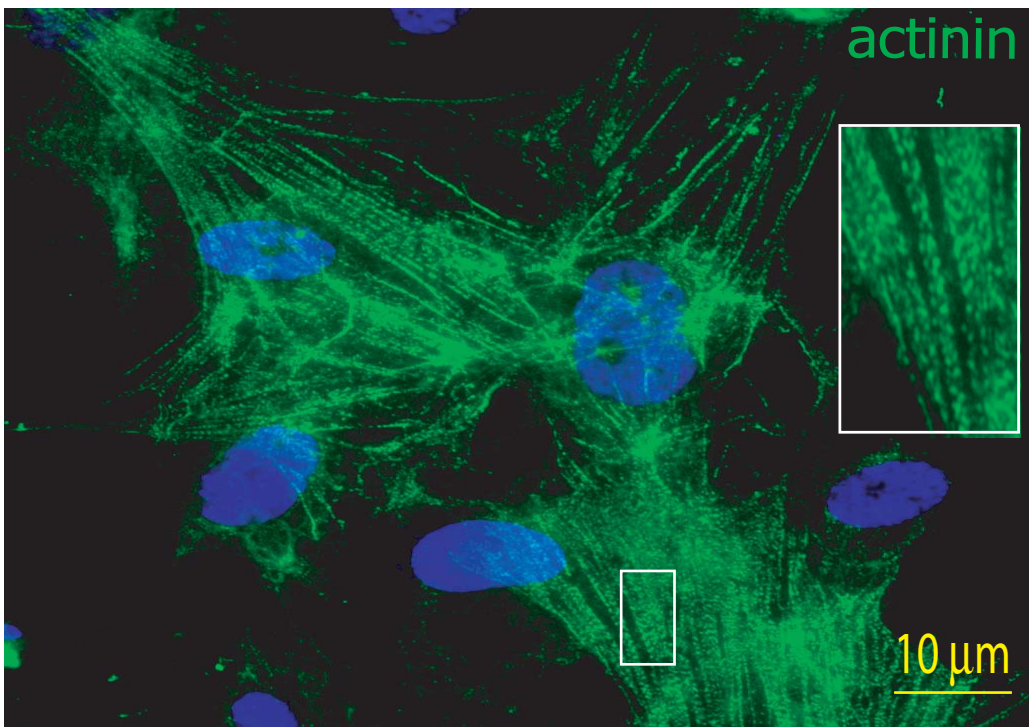

B

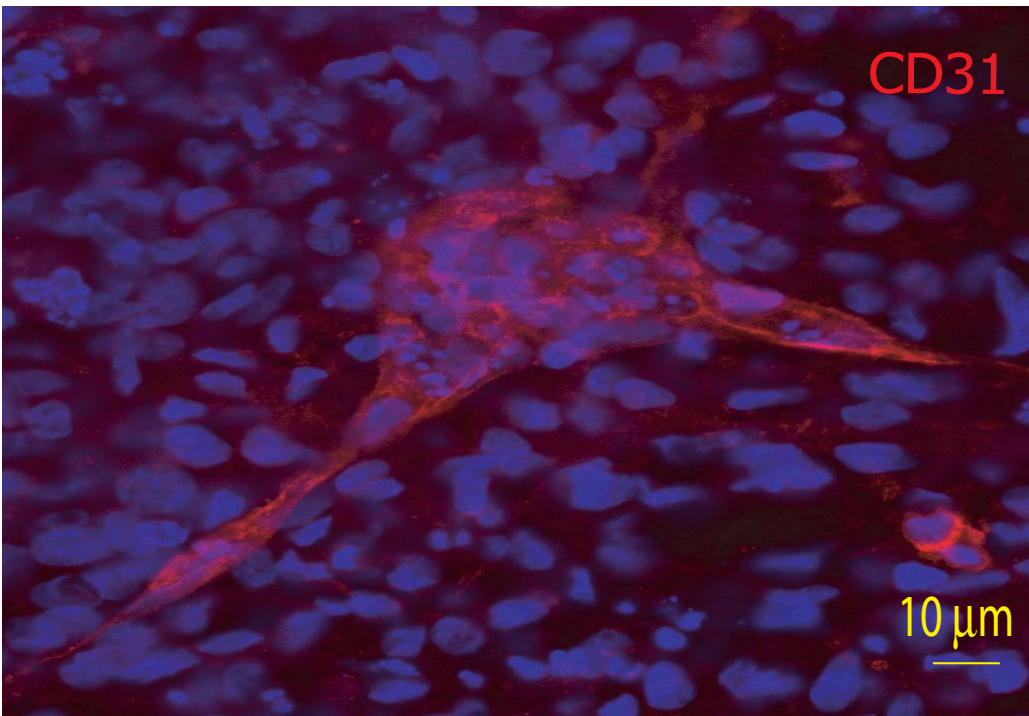

C

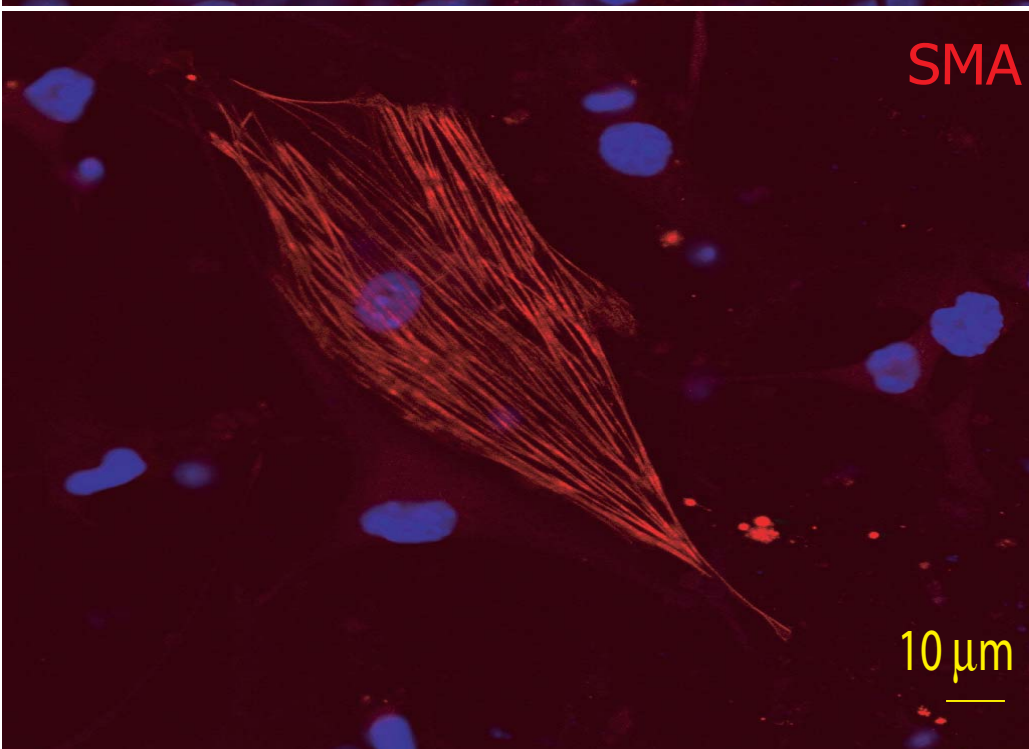



A

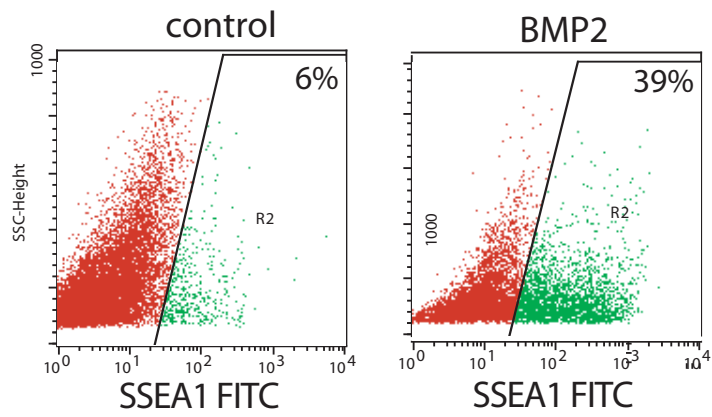

B

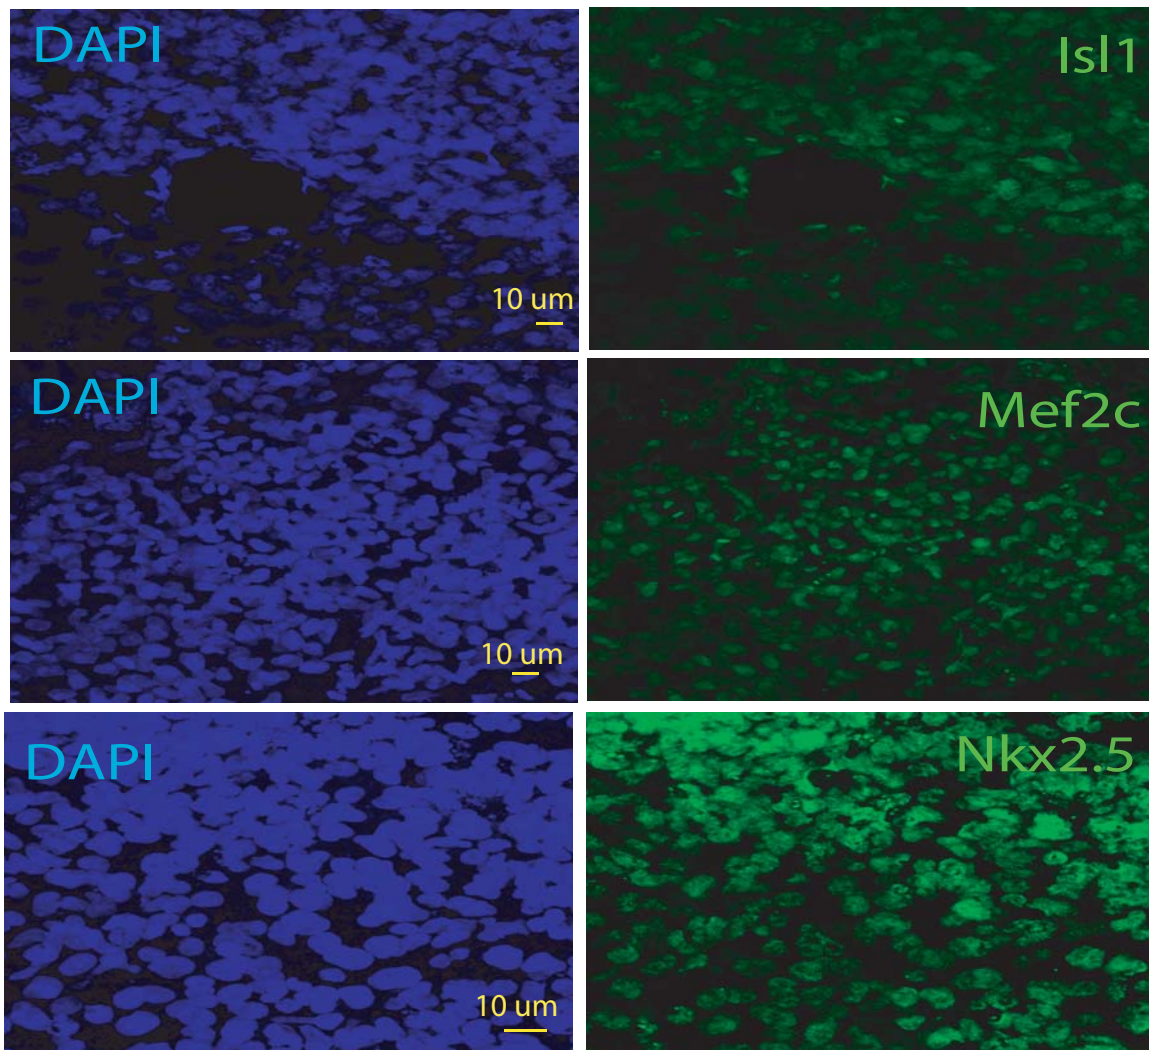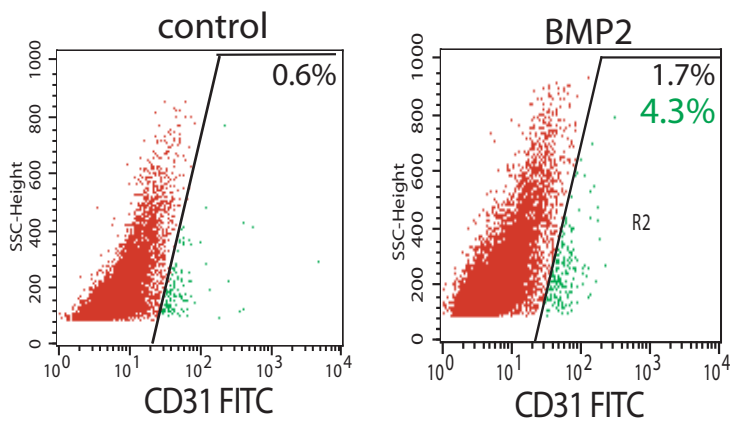

**Supplementary Figure 1:** DKK1 prevents BMP2-induced generation of SSEA-1<sup>+</sup> cardiac progenitors. Human ESCs were treated for 4 days with BMP2 alone or together with DKK and monitored by flow cytometry using the anti-FITC/SSEA-1 antibody. The experiment was performed in duplicate.

**Supplementary Figure 2:** Flow cytometry analysis of SSEA-1<sup>+</sup> cells (A) using an anti-CD31 antibody (B); gates were set as a function of control undifferentiated (SSEA-1 negative) cells. The percentage in green indicates the percentage of positive cells normalised to the percentage of SSEA-1<sup>+</sup> cells. (C) SSEA-1<sup>+</sup> sorted cells were cultured for one week on MEF and then plated for 10 days on collagen-I-coated dishes and treated with VEGF (50ng/ml). The images show the morphology of cells and an anti-CD31 immunostaining and the graph, the real time PCR quantitation of Flk1, CD31 and CD34 mRNAs levels normalised to HUES SSEA-1 negative cells. (D) SSEA-1<sup>+</sup> sorted cells were plated for 10 days on collagen IV and challenged by VEGF. Formation of capillaries (left image) is evidenced by anti-VE cadherin immunostaining and cell morphology (right images).

**Supplementary Figure 3:** (A) Real time PCR monitoring of gene expression in SSEA-1<sup>-</sup> and SSEA-1<sup>+</sup> sorted cells and in SSEA-1<sup>+</sup> cells stimulated for 4 days with FGF8 (B) Real time PCR monitoring of gene expression in single colonies. SSEA-1<sup>+</sup> single colonies cultured for one week on MEF were picked-up randomly and RNA extracted. Expression of genes was monitored by real-time PCR. Results are normalised to GAPDH expression and SSEA-1<sup>-</sup> cells. The first bar from each gene indicates gene expression in SSEA-1<sup>-</sup> cells and the following are SSEA-1<sup>+</sup> colonies from 1 to 12 in the same order for all genes.

**Supplementary Figure 4 :** a single clone of SSEA-1<sup>+</sup> cardiovascular progenitors give rise to cardiomyocytes (upper panel) when cultured on human fibroblasts (inset: magnification of sarcomeres), endothelial CD31<sup>+</sup> cells (middle panel) when cultured on collagen 1 and treated for one week with VEGF and SMA<sup>+</sup> smooth muscle cell (bottom panel) when cultured on collagen 1 and treated with PDGF. This experiment was repeated with 5 separate clones.

**Supplementary Figure 5:** iPS cells give rise to SSEA-1<sup>+</sup> cardiovascular progenitors.

iPS cells challenged with BMP2 expressed SSEA-1 (**A**) and CD31 (**B**) monitored by flow cytometry as well as 3 cardiac-restricted markers (Isl1, Mef2c, Nkx2.5) following one week of culture on MEF. In the CD31 panel, the percentage in green indicates the percentage of positive cells normalised to the percentage of SSEA-1<sup>+</sup> cells. The scale bars indicate 10 µm.
